# Supplementary material for: Caspase-8 modulates physiological and pathological angiogenesis during retina development
Source: JCI journal article supplement (doi:10.1172/jci122767), 2019-08-27
Supplement: sd1 [file 1]

## **SUPPLEMENTAL MATERIAL**

## **SUPPLEMENTAL METHODS**

### **Cell culture**

Human umbilical vein endothelial cells (HUVECs; PromoCell) were cultured in Endopan 3 Kit for endothelial cells (PAN-Biotech) supplemented with 10% FBS, 100 U/ml penicillin and 100 µg/ml streptomycin (both Gibco® by Life Technologies) in a 5% CO<sub>2</sub> humidified incubator at 37°C. Cells from passages 2 to 5 were used for the experiments. When indicated, cells were starved in growth factor-free Endopan 3 supplemented with 2% FBS, 100 U/ml penicillin and 100 µg/ml streptomycin.

### **RNA extraction and quantitative Real-Time PCR analysis**

RNA was extracted with the mini RNA extraction kit (Qiagen). RNA samples were transcribed to complementary DNA using Maxima Reverse Transcriptase (Thermo Scientific) or SuperScript VILO cDNA Synthesis Kit (Invitrogen). qRT-PCR was performed using Fast SYBR Green Master Mix (Thermo Scientific). Either *GAPDH* or *ActB* were used as housekeeping genes. All qPCR results from cultured cells were obtained from at least 3 independent experiments. Results from lung isolated ECs are from 4 independent litters.

### **siRNA transfection**

HUVECs were seeded in a 6 well plate ( $9 \times 10^4$ - $11 \times 10^4$  cells/well). The next day, cells were transfected with MISSION® siRNA Universal Negative Control (Sigma-Aldrich) or previously validated siRNAs for Casp-8 (1) and/or RIPK3 (2) using Oligofectamin (Life Technologies), according to the manufacturer's instructions. The final concentration of siRNA solution was 200nM.

### **Lentiviral vectors and virus production**

For silencing experiments, previously used and validated lentiviral vectors to express shRNAs against Caspase-8, c-FLIP or control (3-5) were used. Lentiviruses were produced by transfection of HEK293-T cells with the calcium phosphate method with the corresponding vectors. Lentivirus-containing

supernatants were collected 48/72 h after transfection and concentrated by ultracentrifugation at 22,000 rpm for 90 minutes at 4 °C.

### **In vitro BrdU incorporation**

To analyze EC proliferation in vitro,  $25 \times 10^3$  infected HUVECs (shCtrl or shCasp-8) were plated in 0.1% gelatin/water coated coverslips. After overnight starvation, cells were treated with or without VEGF (50ng/ml) or FGF (50n/ml), for 24 h. BrdU (10 $\mu$ M) was added and incubation of the cultures continued for 4h at 37°C. Cells were fixed in 4% PFA/PBS for 20min and permeabilized and blocked in 2% BSA 0.3% Triton X-100/PBS for 30min at RT. After unmasking with ice-cold HCl, neutralization with sodium borate buffer (0.1M Na<sub>2</sub>B<sub>4</sub>O<sub>7</sub> in water, pH 8.5) for 15min was done prior to primary antibody incubation. An anti-BrdU antibody (1:250, OBT0030, Oxford Biotechnology) was incubated in blocking solution overnight at 4 °C and an appropriate Alexa Fluor™-conjugated secondary antibody was incubated for 2h at RT. Nuclei were counterstained with DAPI (1:1000, D1306, Invitrogen). Cells were mounted and imaged in a wide field microscope (Zeiss Axiovert 200) equipped with an AxioCam MRm camera (40x objective). Around 100 cells per condition of 3 independent experiments were quantified blind to experimental conditions.

### **WST-1 assay**

The WST-1 cell proliferation and viability assay (Sigma-Aldrich) was done according to the manual as previously described (6). Briefly, transfected HUVECs were plated in a 96 well plate and allowed to attach overnight. Then, cells were starved overnight and stimulated with VEGF (50ng/ml) or control vehicle for 24h.

### **Immunoblotting**

HUVECs were starved overnight and stimulated with VEGF (50ng/ml). When indicated, cells were additionally treated with ZIETD (10 $\mu$ M) in starvation medium overnight. Cells were lysed in lysis buffer (20mM Tris, 137mM NaCl, 2mM EDTA, 10% glycerol, Roche Protease and Phosphatase Inhibitor

Cocktail). Proteins were separated by SDS-PAGE and immunoblotted according to standard protocols. GAPDH (1:10000, SC-47724, Santa Cruz), p-p38 (1:1000, ref.36-8500, Invitrogen), p38 (1:1000, ref.9228, Cell Signaling), p-Akt Ser473 (1:1000, ref.4060, Cell Signaling), Akt (1:1000, ref.9272, Cell Signaling), p-FAK Tyr397 (1:1000, ref.3283, Cell Signaling), FAK (1:1000, ref.3285, Cell Signaling), p-ERK p44/42 (1:1000, ref.9106, Cell Signaling), ERK (1:1000, ref.9102, Cell Signaling), RIPK3 (1:1000, ref.13526, Cell Signaling), Casp-8 (1:1000, ALX-804-429, Enzo), c-FLIP (1:1000, AG-20B-0056, AdipoGen).

## References

1. Iurlaro R, Puschel F, Leon-Annicchiarico CL, O'Connor H, Martin SJ, Palou-Gramon D, et al. Glucose Deprivation Induces ATF4-Mediated Apoptosis through TRAIL Death Receptors. *Molecular and Cellular Biology*. 2017;37(10).
2. Hanggi K, Vasilikos L, Valls AF, Yerbes R, Knop J, Spilgies LM, et al. RIPK1/RIPK3 promotes vascular permeability to allow tumor cell extravasation independent of its necroptotic function. *Cell Death Dis*. 2017;8(2):e2588.
3. Martin-Perez R, Yerbes R, Mora-Molina R, Cano-Gonzalez A, Arribas J, Mazzone M, et al. Oncogenic p95HER2/611CTF primes human breast epithelial cells for metabolic stress-induced down-regulation of FLIP and activation of TRAIL-R/Caspase-8-dependent apoptosis. *Oncotarget*. 2017;8(55):93688-703.
4. Wiznerowicz M, and Trono D. Conditional suppression of cellular genes: lentivirus vector-mediated drug-inducible RNA interference. *J Virol*. 2003;77(16):8957-61.
5. Yerbes R, Palacios C, Reginato MJ, and Lopez-Rivas A. Cellular FLIP(L) plays a survival role and regulates morphogenesis in breast epithelial cells. *Biochim Biophys Acta*. 2011;1813(1):168-78.
6. Wang X, Freire Valls A, Schermann G, Shen Y, Moya IM, Castro L, et al. YAP/TAZ Orchestrate VEGF Signaling during Developmental Angiogenesis. *Dev Cell*. 2017;42(5):462-78 e7.

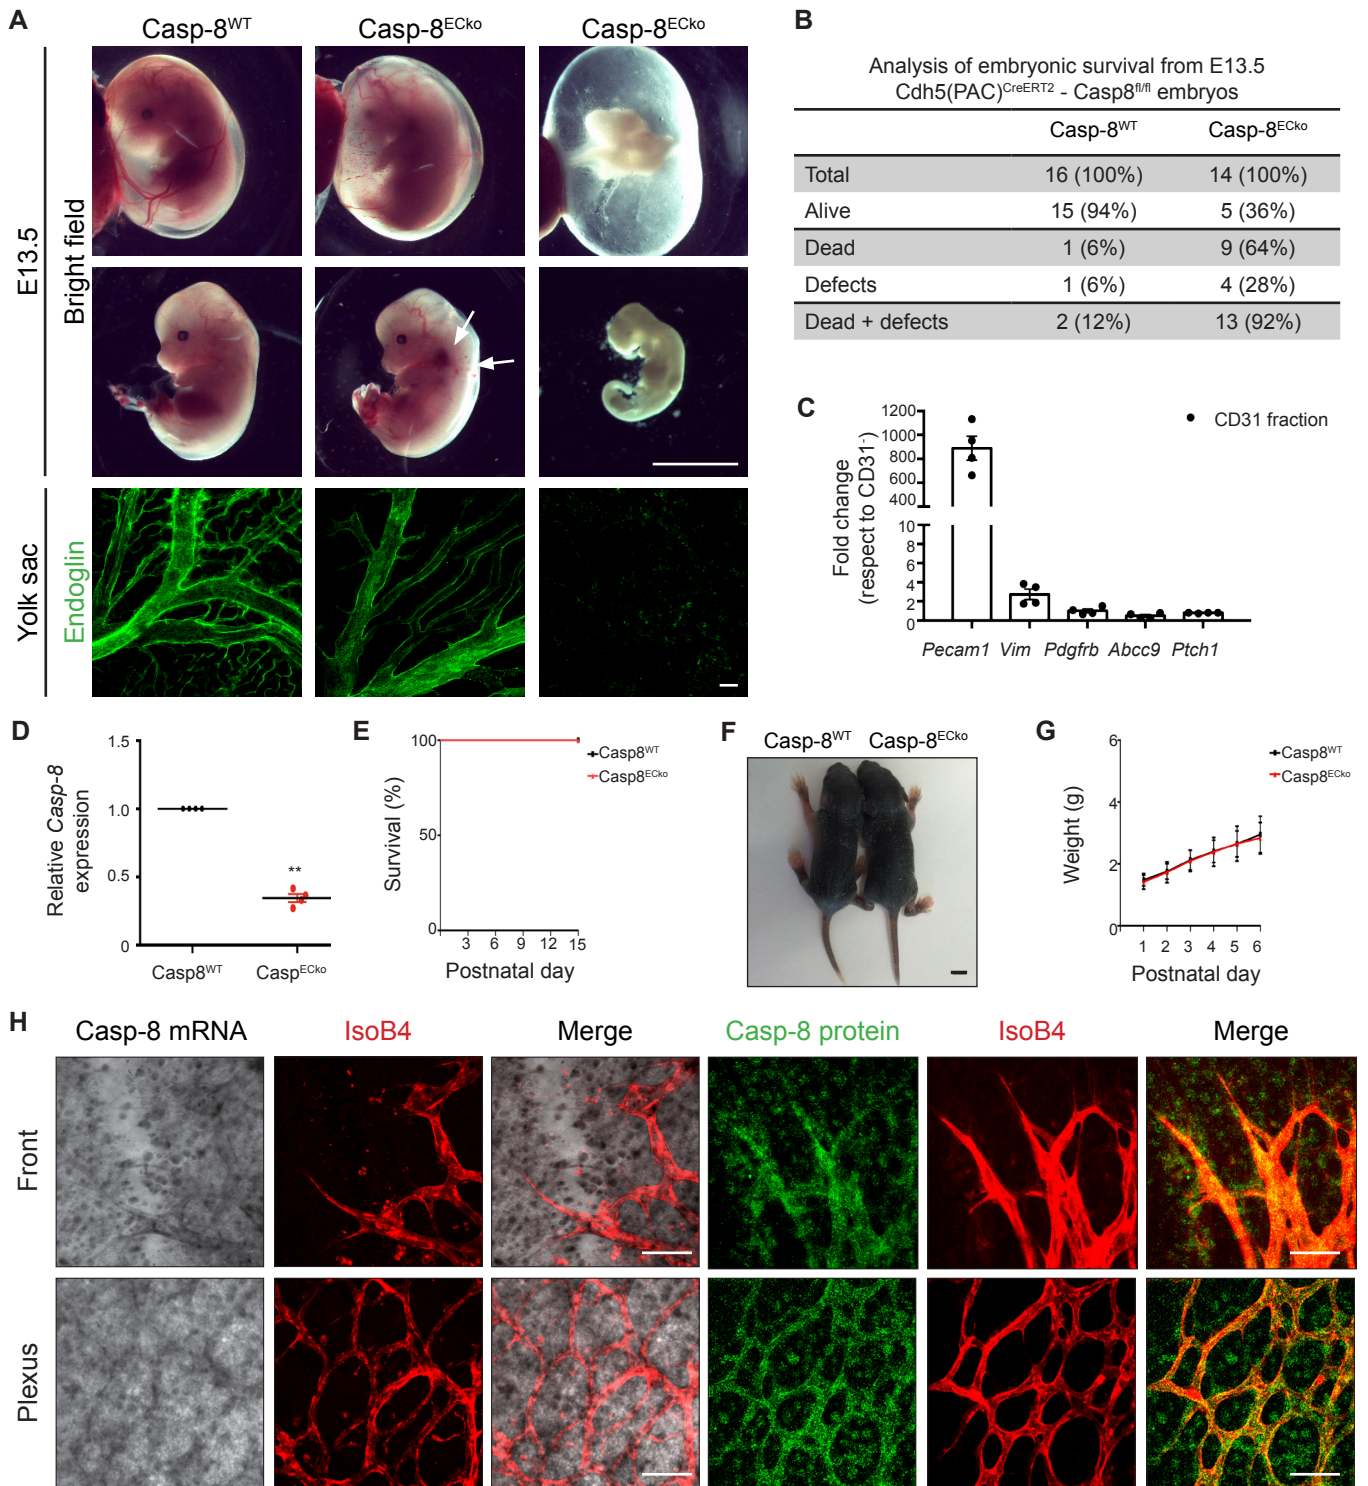

**Suppl Fig 1. Knockout of Casp-8 in ECs is lethal during embryonic, but not postnatal development.**

**A)** Casp-8<sup>WT</sup> and Casp-8<sup>E~~Cko~~</sup> mouse embryos at E13.5. Upper and middle panels: embryo overview showing developmental arrest or severe haemorrhages (white arrows) in Casp-8<sup>E~~Cko~~</sup> embryos. Lower panels: immunostaining for the EC marker Endoglin, showing impaired yolk sac vasculature in Casp-8<sup>E~~Cko~~</sup> embryos (E13.5). **B)** Table of embryonic lethality of Casp-8<sup>E~~Cko~~</sup> embryos at E13.5. **C)** qRT-PCR of isolated lung ECs showing purity of the CD31<sup>+</sup> fraction. Values were normalized to the CD31<sup>-</sup> fraction. **D)** qRT-PCR of isolated lung ECs showing knockout efficiency in Casp-8<sup>E~~Cko~~</sup> pups (results from 4 independent litters; \*\*  $P < 0.01$ ; one-sample  $t$ -test). **E)** No differences between genotypes were observed on mouse weight ( $n=25$  WT, 22 E~~Cko~~). **F)** Representative images from Casp-8<sup>WT</sup> and Casp-8<sup>E~~Cko~~</sup> mice. **G)** No differences between genotypes were observed on survival ( $n=25$  WT, 22 E~~Cko~~). **H)** *In situ* hybridization (mRNA) or immunofluorescence (protein) showing Casp-8 expression at the front and the back (plexus) of P6 mouse retinas. Data represent mean  $\pm$  SEM. Scale bars: A) 1cm (upper panel) and 100 $\mu$ m (lower panel); F) 5mm; H) 100 $\mu$ m.

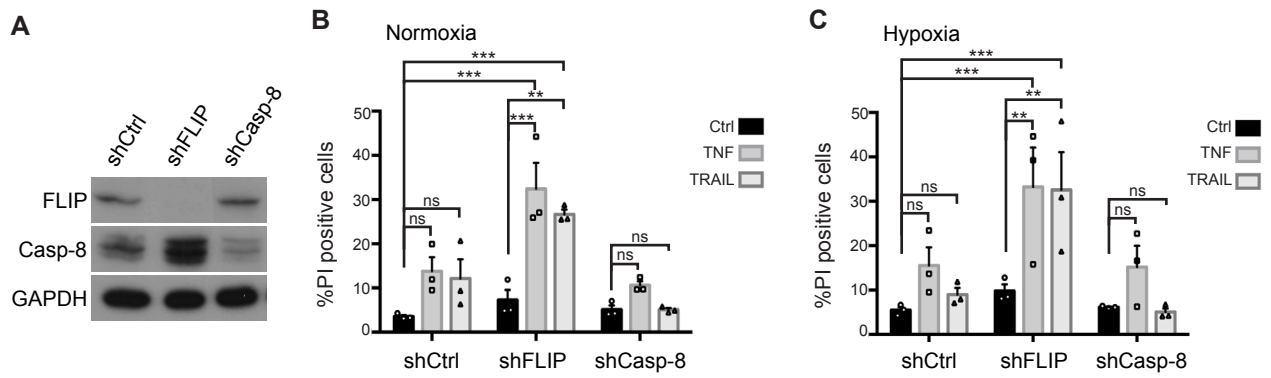

**Suppl Fig. 2. Knockdown of Casp-8 in ECs does not increase cell death *in vitro*.**

**A)** Western blot showing protein knockdown efficiency after infecting HUVECs with a lentivirus carrying shRNAs for c-FLIP or Casp-8. **B,C)** Quantification of apoptotic/necrotic HUVECs (PI<sup>+</sup>) in normoxia (B) or hypoxia (C) showing that knockdown of c-FLIP (shFLIP), after the indicated treatments, increases cell death while knockdown of Casp-8 (shCasp-8) does not, n=3. Data represent  $\pm$  SEM (\*\*  $P < 0.01$ , \*\*\*  $P < 0.001$ , ns: not significant; two-way ANOVA with Bonferroni's multiple comparisons test).

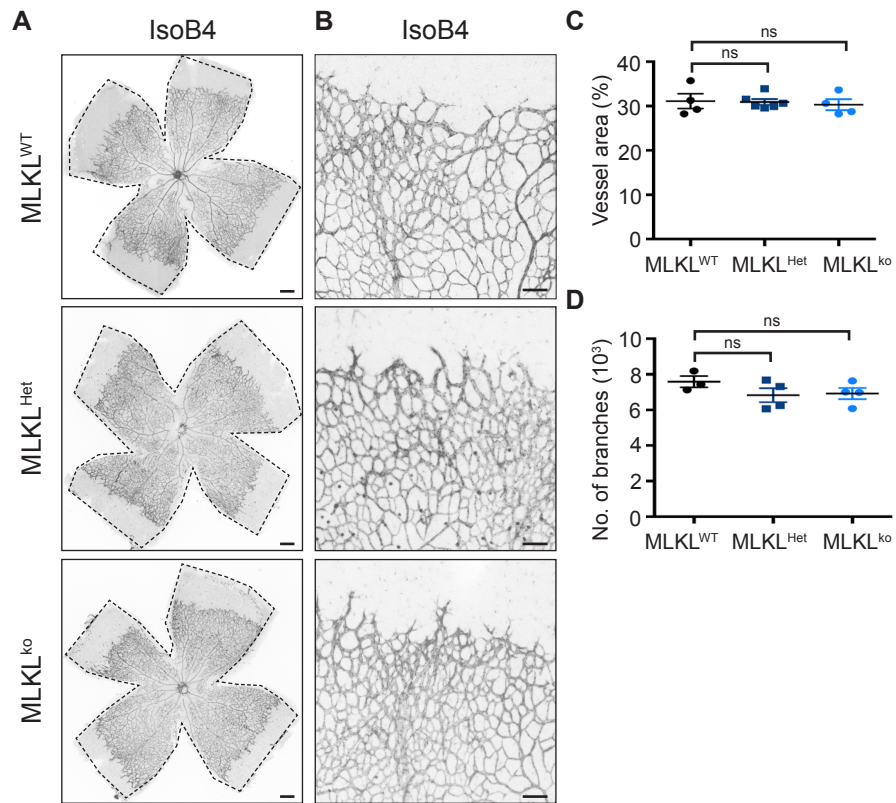

**Suppl Fig. 3. MLKL knockout pups do not present impaired postnatal angiogenesis.**

**A,B)** Representative images of whole mount P6 retinas of MLKL<sup>WT</sup>, MLKL heterozygous (MLKL<sup>Het</sup>) and MLKL<sup>ko</sup> mice stained with IsoB4 (ECs) (A) and higher magnifications of the retina front (B). Black dashed lines highlight the total retina area. **C,D)** Quantification of vessel area (C; n=4 WT, 6 Het, 4 ko) and number of branches (D; n=3 WT, 4 Het, 4 ko). For C,D data represent mean ± SEM from 2 independent litters (ns: not significant; one-way ANOVA with Bonferroni's multiple comparisons test). Scale bars: A) 100µm; B) 50µm.



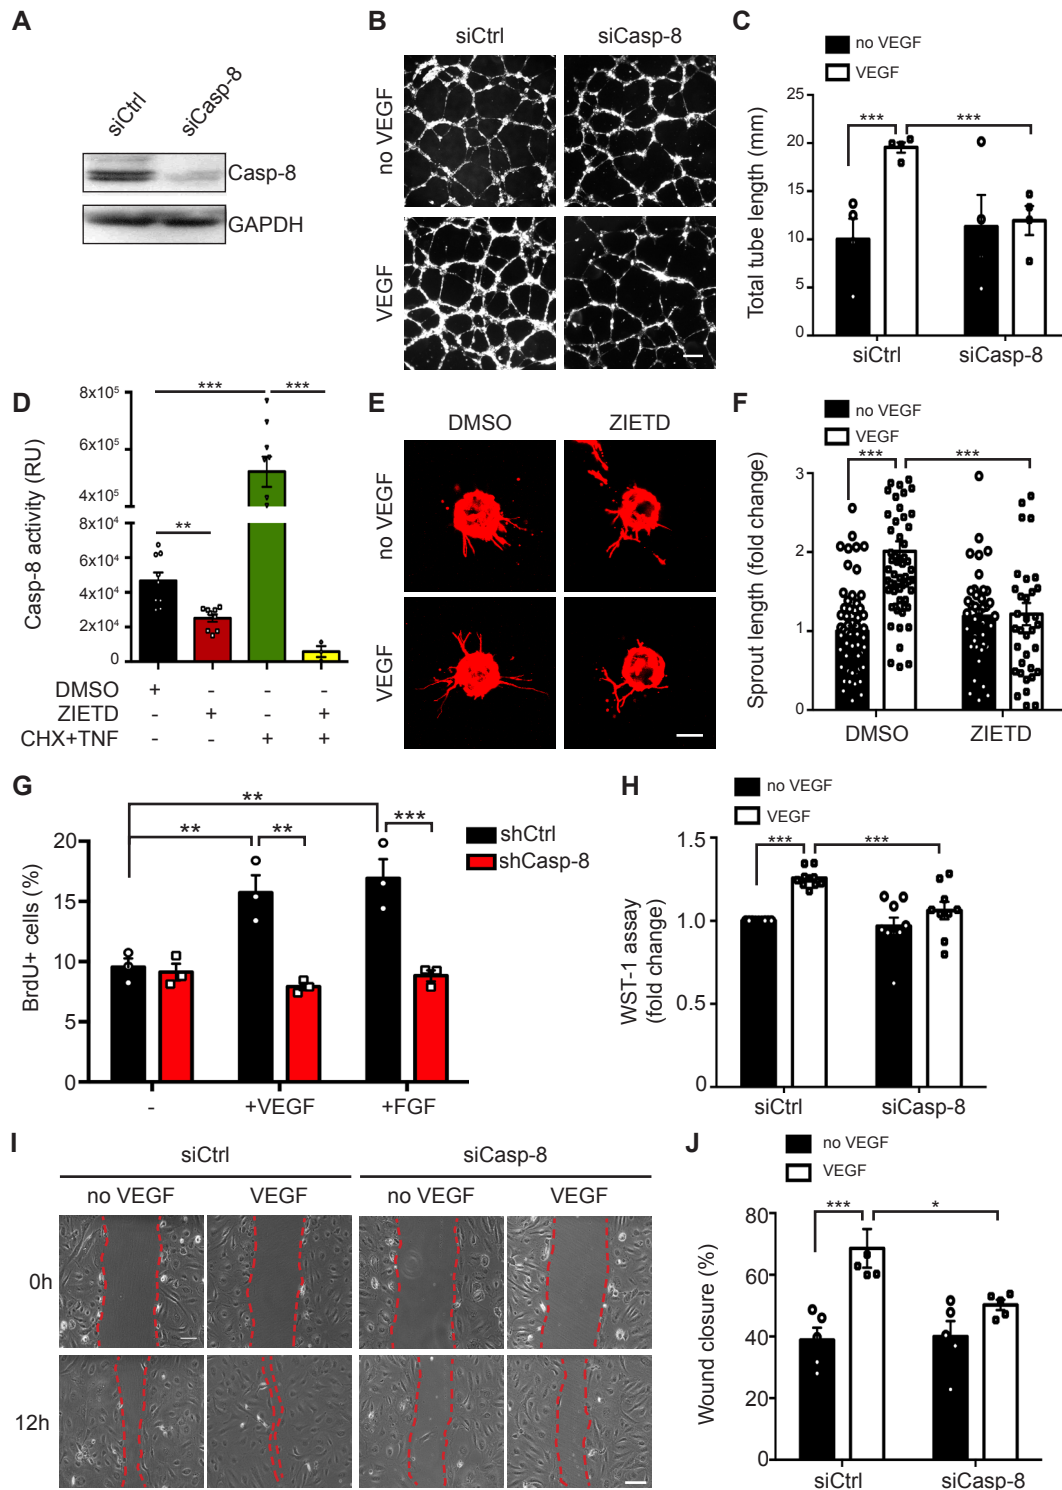

**Suppl Fig. 4. Knockdown of Casp-8 impairs VEGF-induced tube formation, EC proliferation and migration *in vitro*.**

**A**) Western blot showing the knockdown efficiency of the Casp-8 siRNA. **B**) Bright field representative images of the tube formation assay. HUVECs were transfected with control siRNA (siCtrl) or Casp-8 siRNA (siCasp-8) and treated with VEGF (50ng/ml) for 4h. **C**) Quantification of the total tube length as in (B) showing that Casp-8 knockdown inhibits VEGF-induced tube formation. 5 fields per condition were quantified, n=3. **D**) Casp-8 activity was measured with a Casp-8 Glo kit. HUVECs' basal Casp-8 activity can be blocked with the Casp-8 inhibitor ZIETD (10µM) or induced by cycloheximide (CHX, 1µg/ml) plus TNF (100ng/ml) for 4h, n=3. Data represent ± SEM (\*\* P < 0.01, \*\*\* P < 0.001; two-tailed unpaired Student t-test). **E**) Representative images of the bead-sprouting assay using HUVECs treated with vehicle or ZIETD (10µM) with or without VEGF (50ng/ml) stimulation. **F**) Quantification of the total sprout length shows that blocking Casp-8 activity impairs VEGF-induced sprouting. Approximately 10 beads per condition were quantified, n=4. **G**) BrdU+ HUVECs were quantified in control and Casp-8<sup>KD</sup> ECs with or without VEGF (50ng/ml) or FGF (50 ng/ml) stimulation (24h). Around 100 cells per condition were quantified, n=3. **H**) WST-1 assay showing no response to VEGF-induced proliferation in Casp-8<sup>KD</sup> ECs (24h), n=9. **I**) Representative bright field images of the scratch migration assay of HUVECs transfected with siCtrl or siCasp-8. Wound closure is reduced in Casp-8<sup>KD</sup> ECs after 12h of VEGF (50ng/ml) stimulation. **J**) Quantification of the gap closure from (I). 15 fields per condition were quantified, n=5. For C,F-H,J data represent ± SEM (\* P < 0.05, \*\* P < 0.01, \*\*\* P < 0.001; two-way ANOVA with Bonferroni's multiple comparisons test). Scale bars: B,E) 100µm; I) 200µm.



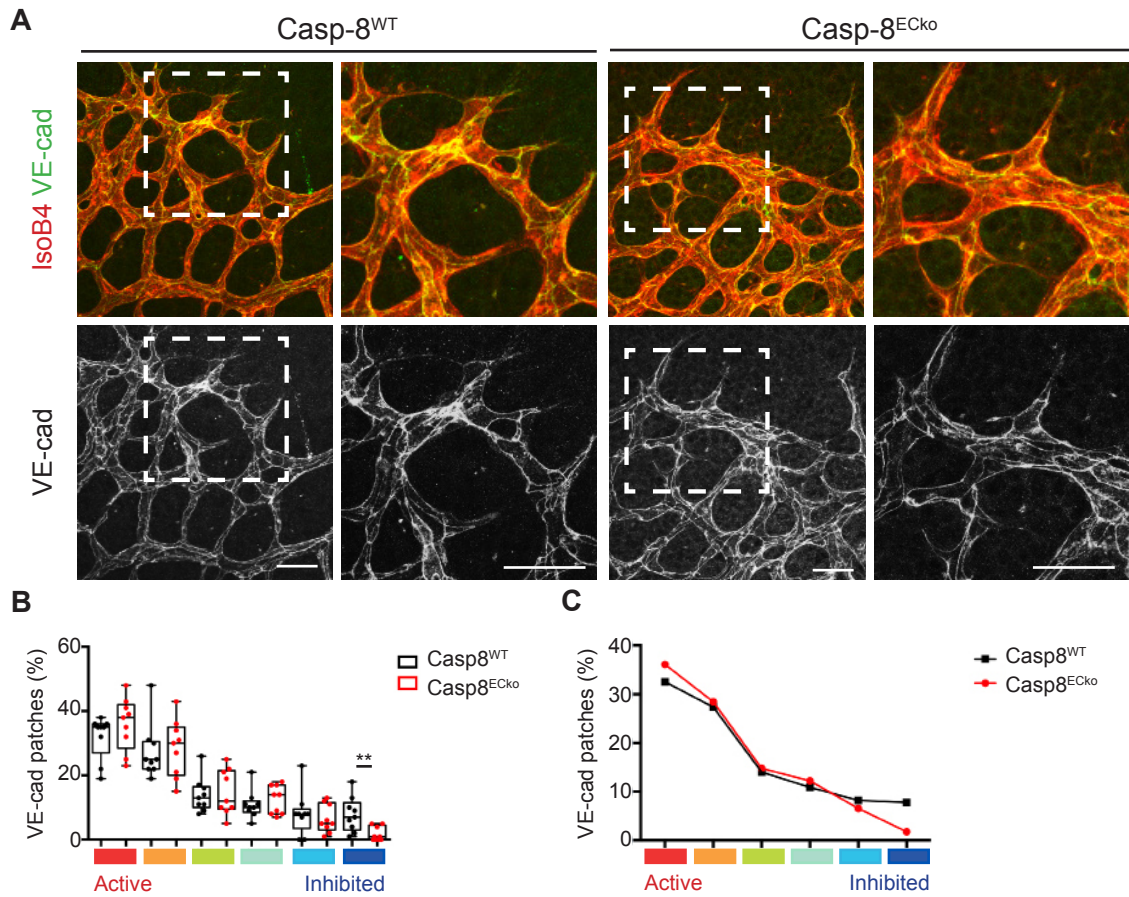

**Suppl Fig. 5. Casp-8<sup>ECKO</sup> mice show an active VE-cadherin staining at the junctions of the sprouting front.**

**A)** Representative images of the front of the retina stained with IsoB4 and VE-cadherin. Images of the VE-cadherin single channel were transformed to grey colors with ImageJ for better visualization. **B)** Quantification of the percentage of VE-cadherin patches in the sprouting front showing only a mild reduction in Casp-8<sup>ECKO</sup> mice in the number of highly inhibited VE-cadherin patches compared to Casp-8<sup>WT</sup>. Each box shows the median percentage of patches of that type (line), and upper and lower quartiles (box). The whiskers extend to the most extreme data within 1.5 times the interquartile range of the box. (\*\*  $P < 0.01$ ; Dirichlet regression model with two-tailed Mann Whitney test for each state;  $n=9$  WT, 9 ECKO). **C)** Average of the differential distribution of the percentage of VE-Cadherin patches of Casp-8<sup>WT</sup> and Casp-8<sup>ECKO</sup> retinas. Data from 3 independent litters. Scale bars: A) 20 $\mu$ m.

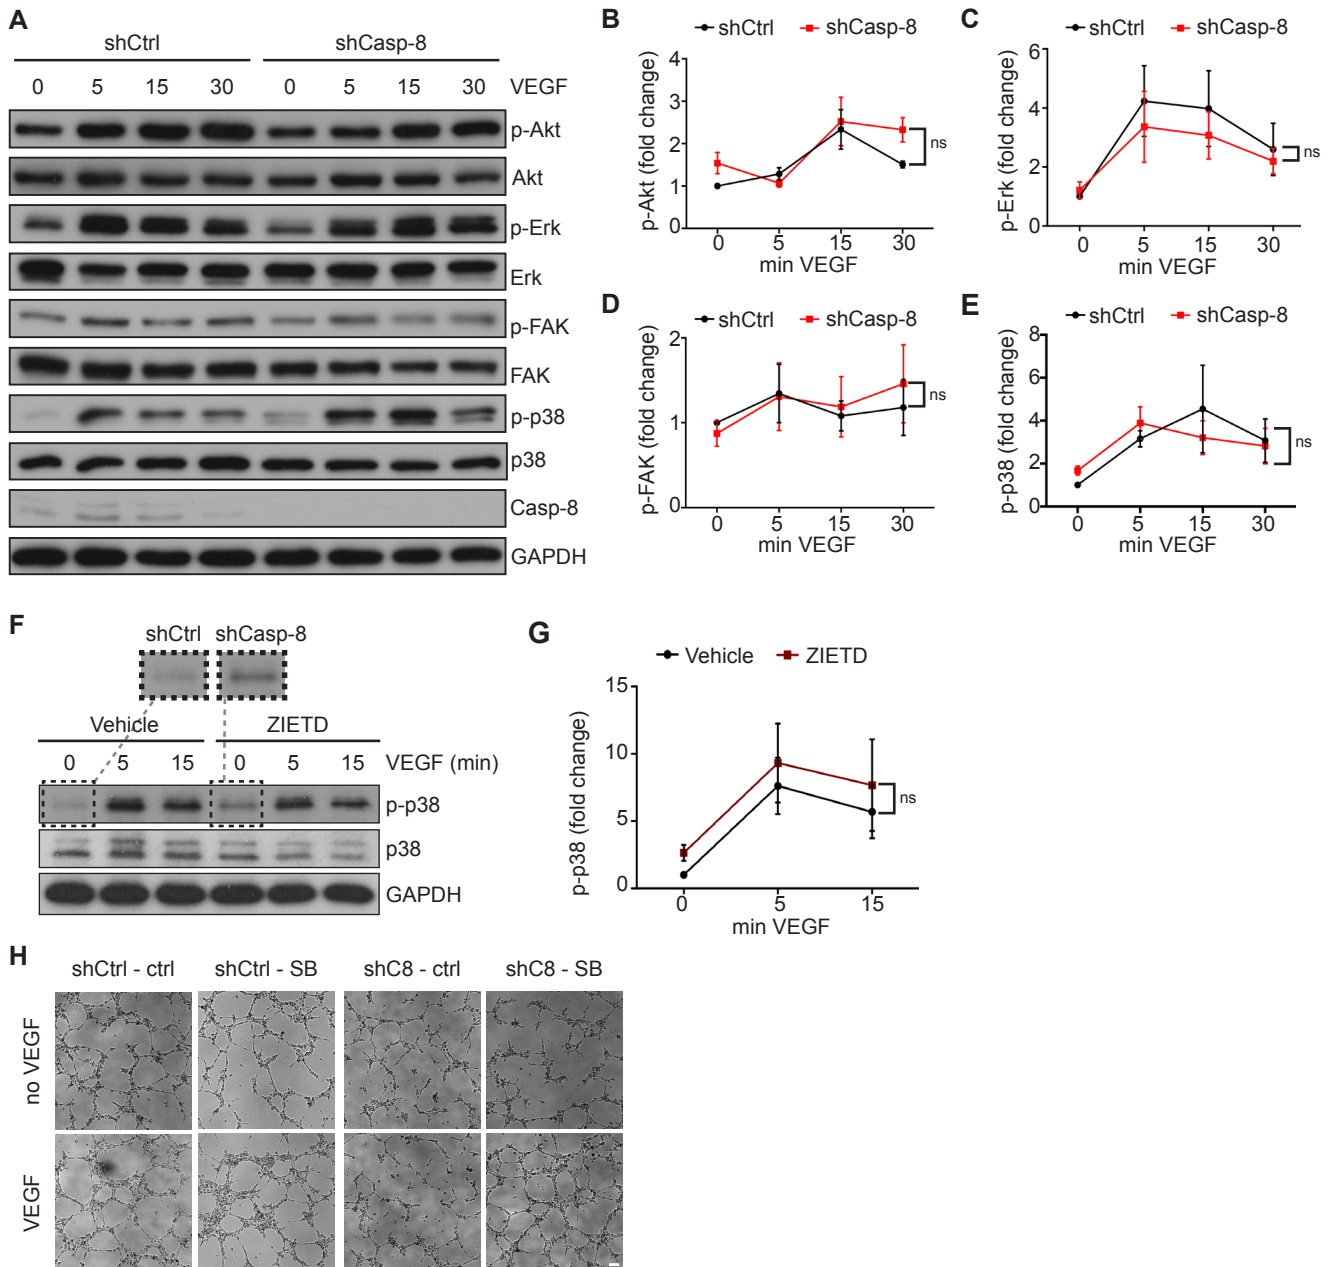

**Suppl Fig. 6. VEGF-induced phosphorylation of Akt, ERK, FAK and p38 is not affected by loss of Casp-8 in ECs.**

**A)** Western blot showing that the Akt, ERK, FAK and p38 signaling pathways are normally activated upon VEGF stimulation in Casp-8<sup>KD</sup> ECs. **B-E)** Quantification of western blots shown in (A), n=3-5. **F)** Western blot of HUVECs treated with ZIETD (10 $\mu$ M, 16h) and stimulated with VEGF (50ng/ml) for the indicated times, showing that blocking Casp-8 activity also induces increased basal p-p38. Insets of p-p38 at basal conditions (of the same blots) are shown in the upper panels. **G)** Quantification of p-p38 after VEGF stimulation, n=3. **H)** Bright field representative images of the tube formation assay quantified in Fig. 6H. ShCtrl or shCasp-8 infected HUVECs were treated with or without p38 inhibitor (SB) and with VEGF (50ng/ml) for 4h. For B-D, F,H data represent mean  $\pm$  SEM (ns: not significant; repeated measures two-way ANOVA). Scale bars: I) 100 $\mu$ m.

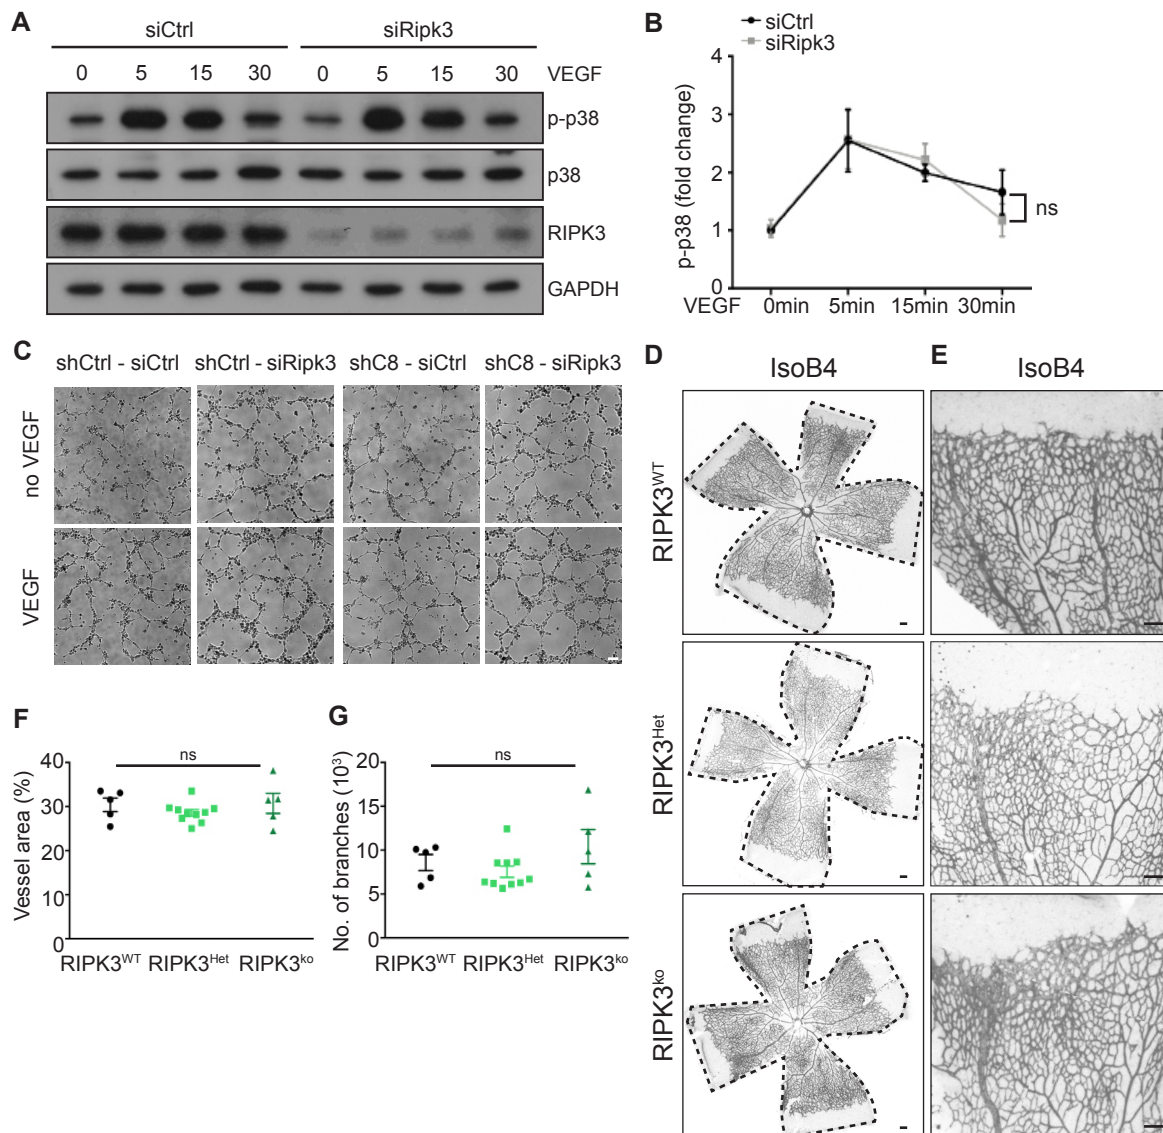

**Suppl Fig. 7. Knockdown of RIPK3 alone has no impact on angiogenesis.**

**A)** Western blot showing that the sole siRNA-mediated knockdown of RIPK3 in HUVECs does not affect p38 activation. HUVECs were stimulated with VEGF for the indicated time points. **B)** Quantification of western blots shown in (A), n=3. **C)** Bright field representative images of the tube formation assay quantified in Fig. 7D. ShCtrl or shCasp-8 infected HUVECs were transfected with control or Ripk3 siRNA and treated with VEGF (50ng/ml) for 4h. **D,E)** Representative images of whole mount P6 retinas of RIPK3<sup>WT</sup>, heterozygous (RIPK3<sup>Het</sup>) and RIPK3<sup>ko</sup> mice stained with IsoB4 (ECs) (D) and higher magnifications of the retina front (E). Black dashed lines highlight the total retina area. **F,G)** Quantification of vessel area (F; n=5 WT, 10 Het, 5 ko) and number of branches (G; n=5 WT, 10 Het, 5 ko). Data represent mean ± SEM (ns: not significant; for B repeated measures two-way ANOVA; for F,G one-way ANOVA with Bonferroni's multiple comparisons test, data from 3 independent litters). Scale bars: C-E) 100µm.



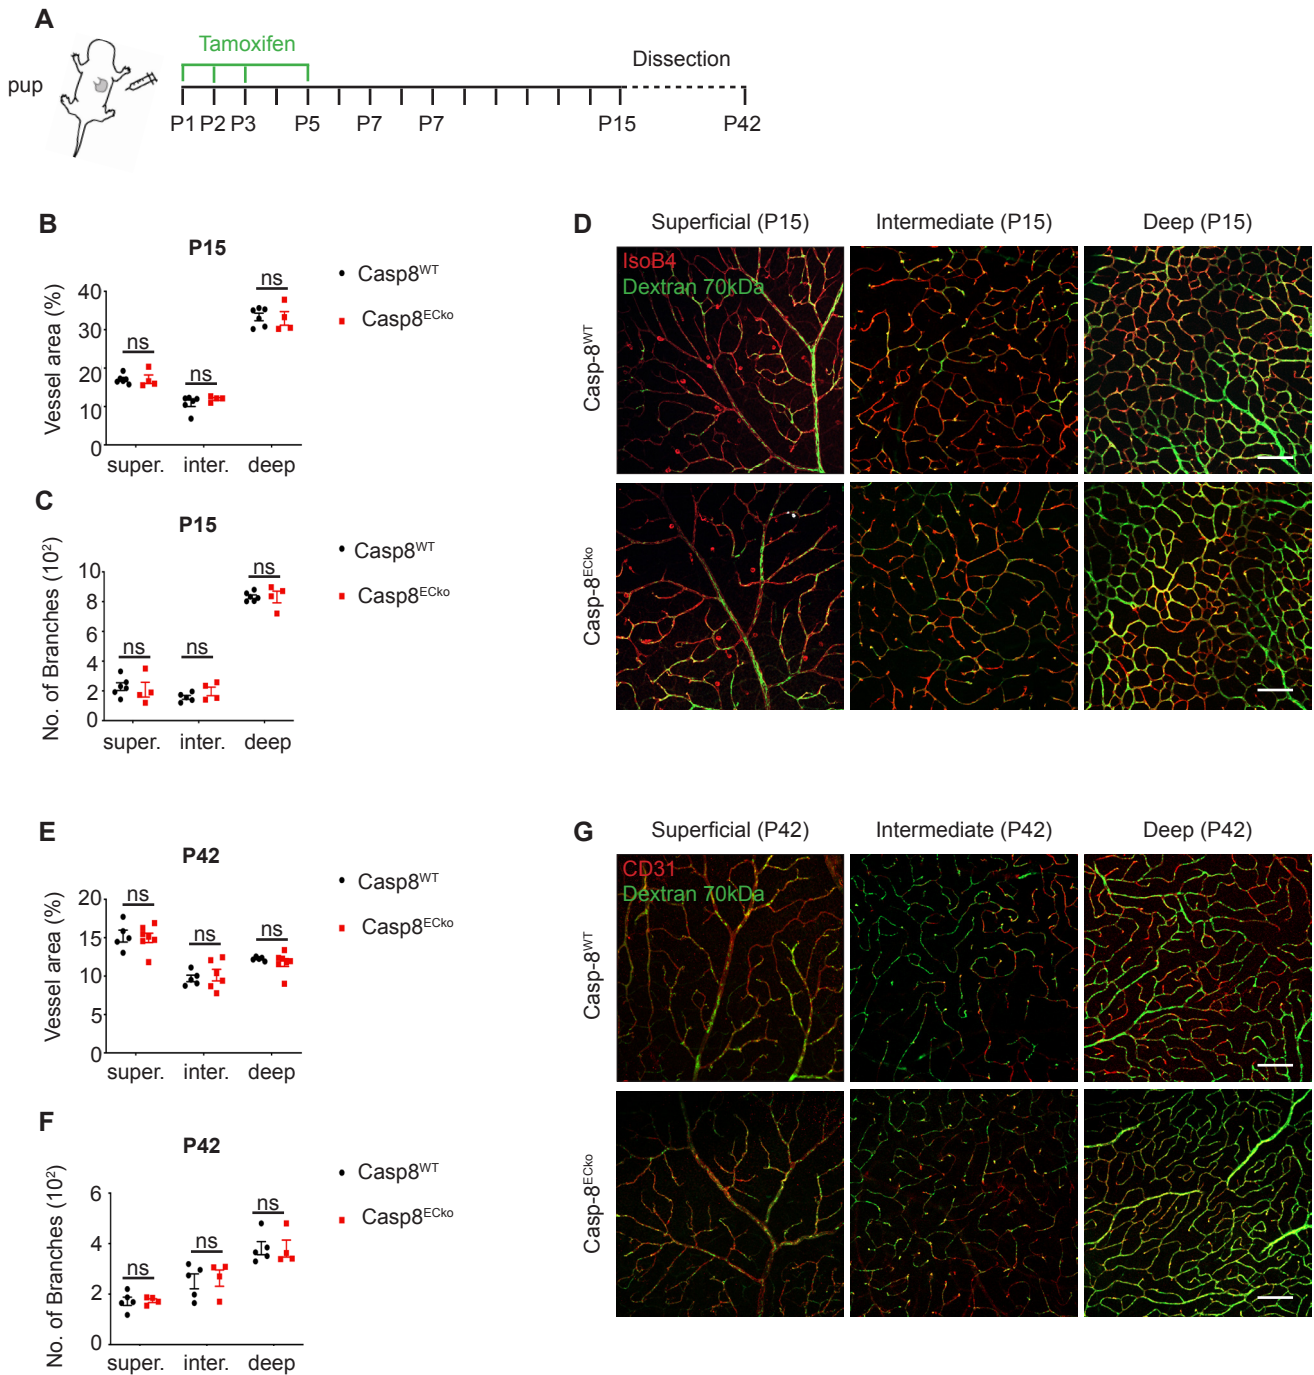

**Suppl. Fig. 8: Vascular defects in Casp8<sup>ECKO</sup> mice are recovered at P15 and P42.**

**A)** Scheme of the applied extended tamoxifen treatment protocol. **B,C)** Neither the vessel area (B), nor the number of branches (C) are affected at P15 in Casp8<sup>ECKO</sup> mice (n=6WT, 4ECKO). **D)** Retro-orbital injection of 70kDa fluorescently labeled Dextran does not reveal qualitative differences in vessel permeability in neither the superficial, intermediate or deep vascular layers in Casp8<sup>ECKO</sup> mice compared to wildtype littermates. Representative pictures show Dextran localized inside, but not outside of IsoB4 labeled vessels. **E-G)** Consistently, no defects regarding vessel area (E), number of branches (F) or vessel permeability (G) were observed in Casp8<sup>ECKO</sup> mice at P42 (n=5WT, 4ECKO). For B,C,E,F data represent mean  $\pm$  SEM (\*  $P < 0.05$ , \*\*  $P < 0.01$ , \*\*\*  $P < 0.001$ ; two-way ANOVA with Bonferroni's multiple comparisons test) Scale bars: D,G) 100 $\mu$ m.
